# Supplementary material
Source: MDPI journal article supplement (https://www.mdpi.com/2227-9040/8/3/68)
Supplement: s1 [file s1]

# Nanometre-Scale Visualization of Chemical Parameter Changes by T<sub>1</sub>-Weighted ODMR Imaging Using a Fluorescent Nanodiamond

Takahiro Fujisaku <sup>1</sup>, Ryuji Igarashi <sup>2,3,4,\*</sup> and Masahiro Shirakawa <sup>1,\*</sup>

<sup>1</sup> Department of Molecular Engineering, Graduate School of Engineering, Kyoto University, Nishikyo-Ku, Kyoto 615-8510, Japan; fuzisaku.takahiro.86s@st.kyoto-u.ac.jp

<sup>2</sup> Institute for Quantum Life Science, National Institutes for Quantum and Radiological Science and Technology, Anagawa 4-9-1, Inage-ku, Chiba 263-8555, Japan

<sup>3</sup> National Institute for Radiological Sciences, National Institute for Quantum and Radiological Science and Technology, Anagawa 4-9-1, Inage-ku, Chiba 263-8555, Japan

<sup>4</sup> JST, PRESTO, 4-1-8 Honcho, Kawaguchi, Saitama 332-0012, Japan

\* Correspondence: igarashi.ryuji@qst.go.jp (R.I.); shirakawa@moleng.kyoto-u.ac.jp (M.S.); Tel.: +81-75-043-206-3221 (R.I.); +81-75-383-2535 (M.S.)

## 1. pH Dependence of a Non-Carboxylated Nanodiamond.

We prepared non-carboxylated nanodiamonds as follows. The nanodiamond powder was electron-irradiated ( $2\text{ MeV}$ ,  $1.0 \times 10^{18}\text{ e}^-/\text{cm}^2$ ) and thermally annealed at  $800\text{ }^\circ\text{C}$  for 2 hours under vacuum to give non-carboxylated nanodiamond characterized by FT-IR and XPS.

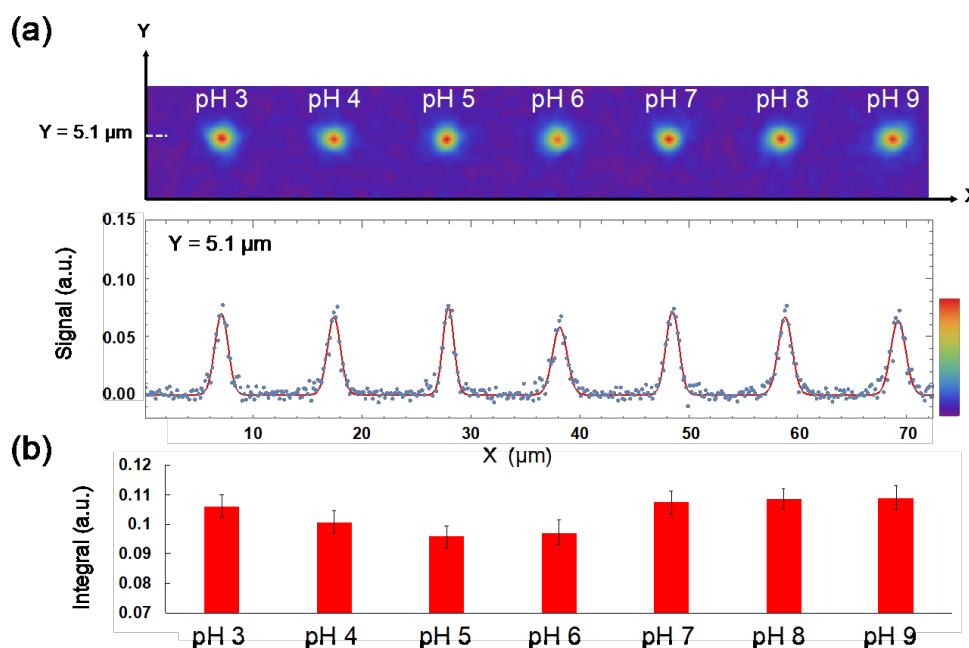

**Figure S1.** (a) T<sub>1</sub>-weighted images of a non-carboxylated 100-nm nanodiamond in various pH conditions (top) and its signal intensity on a cross section Y = 5.1 mm plotted against X (bottom). The red line represents the best fit function consisting of seven Gaussian curves. (b) Definite integrals of the best fit Gaussian curves of each pH condition. Error bars represent the standard error for the fitting.

## **2. Spatial Resolution**

pH affects the charge states of carboxy groups, which were bound to the nanodiamond surface.  $T_1$  of NV centers in nanodiamonds varies depending on the charge states of the surface groups. Therefore, the pH sensing range is around the nanodiamond surface and 1 nm or less. On the other hand, the accuracy of nanodiamond's location estimated from its fluorescence gravity center was about 5 nm or less. When the heterogeneity of particle sizes or shapes is much more significant than the pH sensing range and location accuracy shown above, mainly, the particle heterogeneity limits the spatial resolution. Thus, the spatial resolution in our experiments is considered about 200 nm or less because of the large size distribution of the used 100-nm nanodiamonds (50–200 nm).
